# Supplementary material
Source: PubMed Central journal article supplement (PMC11571963)
Supplement: NIHMS2033214-supplement-Supplementary_Material.pdf [file NIHMS2033214-supplement-Supplementary_Material.pdf]

In the format provided by the authors and unedited.

# The isolation and molecular characterization of cerebral microvessels

Yun-Kyoung Lee<sup>1,3</sup>, Hiroki Uchida<sup>1,3</sup>, Helen Smith<sup>1</sup>, Akira Ito<sup>1</sup> and Teresa Sanchez<sup>id</sup><sup>1,2\*</sup>

---

<sup>1</sup>Department of Pathology and Laboratory Medicine, Center for Vascular Biology, Weill Cornell Medicine, New York, NY, USA. <sup>2</sup>Department of Neuroscience, Brain and Mind Research Institute, Weill Cornell Medicine, New York, NY, USA. \*e-mail: [tes2015@med.cornell.edu](mailto:tes2015@med.cornell.edu)

**Figure 2b**

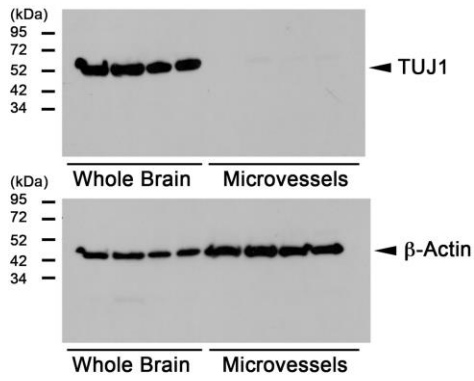

**Figure 7a**

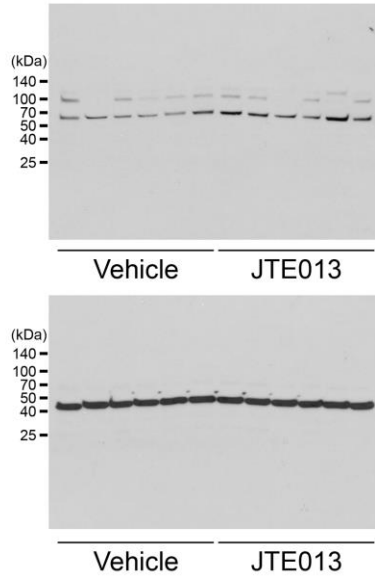

**Figure 7b**

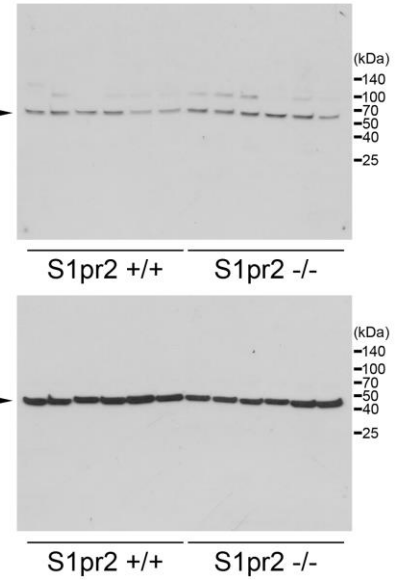

**Supplementary Figure 1**

Images of full-length blots presented in the figures.
